# Supplementary material
Source: PubMed Central journal article supplement (PMC4012480)
Supplement: 5c1fa5e6e7b6f1c0a950256f3eda6641_genetics.113.160523-3.pdf [file 5c1fa5e6e7b6f1c0a950256f3eda6641_genetics.113.160523-3.pdf]

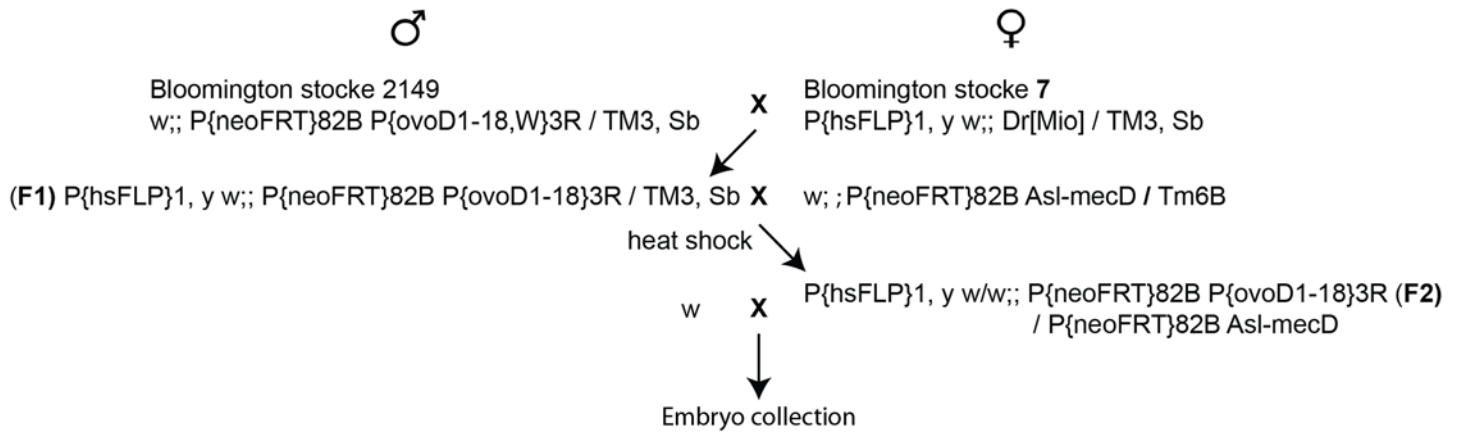

**Figure S1 Generating an embryo from *asl<sup>mecd</sup>* homozygote oocytes** (related to Figure 4). We recently showed that *asl<sup>mecd</sup>*, unlike any other *Drosophila* mutant, completely blocks centriole duplication (BLACHON *et al.* 2008). Since the *asl<sup>mecd</sup>* flies die shortly after emerging from pupa, these flies are not suitable for mating. This lethality can be avoided by using heterozygous *asl<sup>mecd</sup>* females. However, these females provide wild type *asl* mRNA to their oocytes via the maternal contribution; thus, centriole duplication will not be completely blocked in these oocytes. To address this, we generated oocytes that completely lack the Asl protein except in heterozygous *asl<sup>mecd</sup>* females. For this, we created germline *asl* mutant fly lines that lacked any *asl* maternal contribution. This was done using a FLP-FRT recombination technique and *ovo<sup>D1</sup>* mutation that blocks the formation of oocytes that are not *asl<sup>mecd</sup>* homozygotes (CHOU and PERRIMON 1996). Recombination was induced in larvae via a heat shock-inducible Flippase enzyme. Thus, as adults, they produced homozygous *asl<sup>mecd</sup>* oocytes that lacked any Asl protein. Adult females were then mated to wild type males and their zygotes were analyzed.
